# Supplementary material
Source: PubMed Central journal article supplement (PMC5752301)
Supplement: jciinsight-2-96703-s001.pdf [file jciinsight-2-96703-s001.pdf]

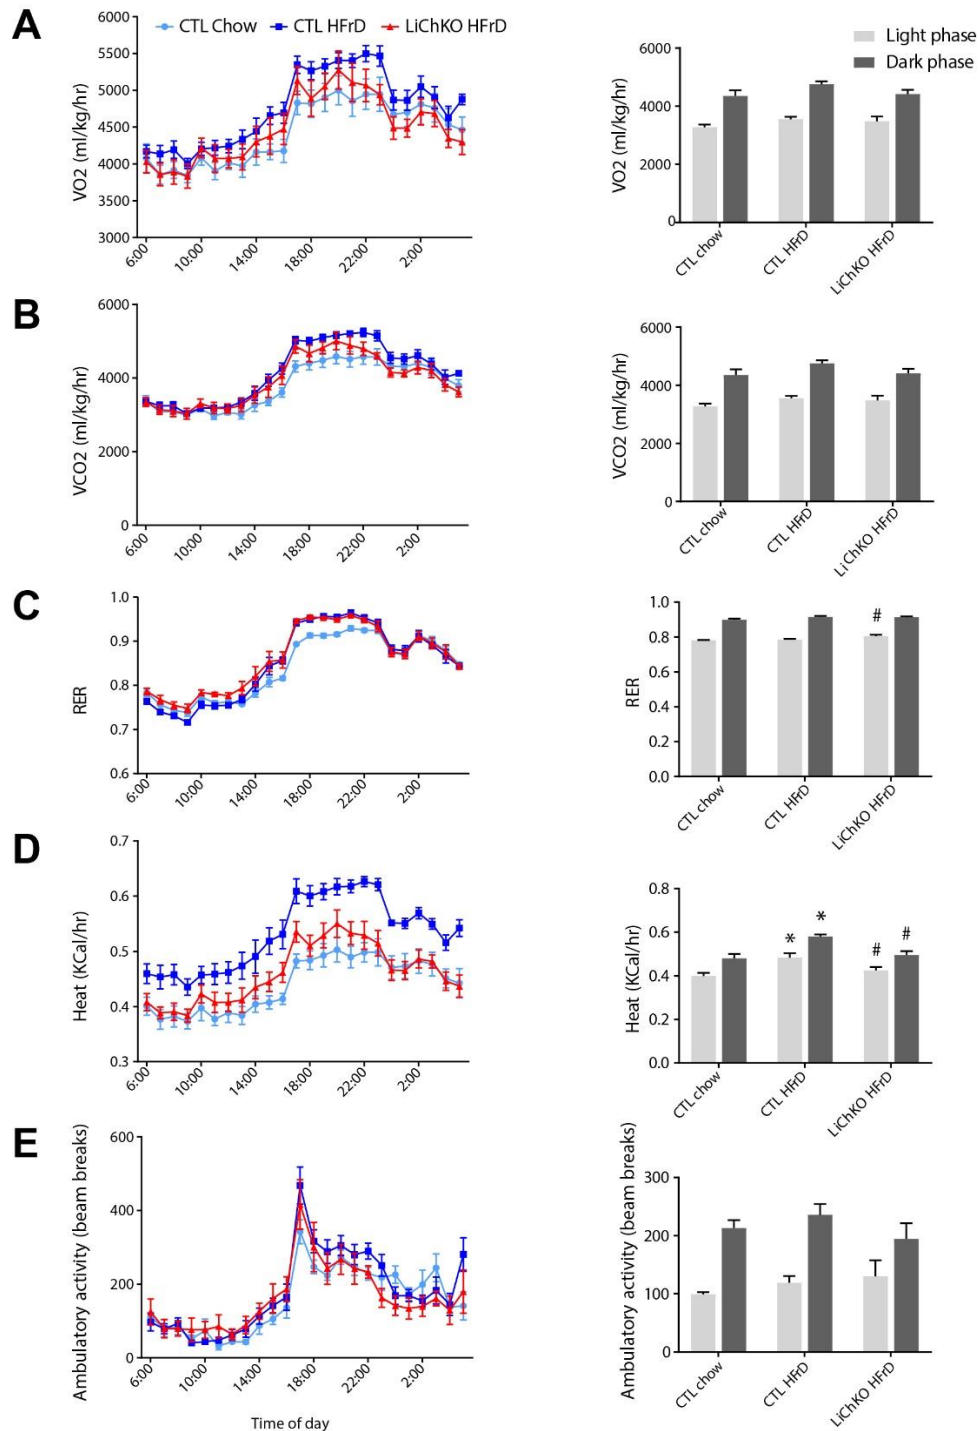

**Supplementary Figure 1.** 7 week old control male mice were put in CLAMS apparatus and fed standard chow or HFrD for a total of 7 days, including 2 days acclimation period. Littermate LiChKO mice were fed HFrD only (n = 4-6 per group). Oxygen consumption (**A**), carbon dioxide production (**B**), respiratory exchange ratio (**C**), heat production (**D**) and ambulatory activity (**E**) were measured for 5 consecutive days, and averaged values for a 24 hour period are presented. P values were obtained using 1-way ANOVA, \*P < 0.05 compared with control on chow; # P < 0.05 compared with control on HFrD.

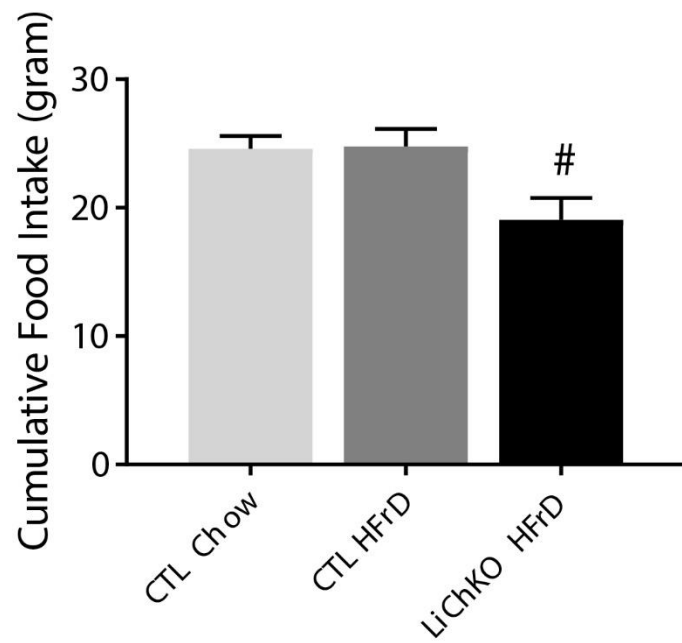

**Supplementary Figure 2.** Cumulative food intake was measured in mice described in Supplementary Figure 1 for 5 consecutive days. P values were obtained using 1-way ANOVA, # P < 0.05 compared with control on HFrD.

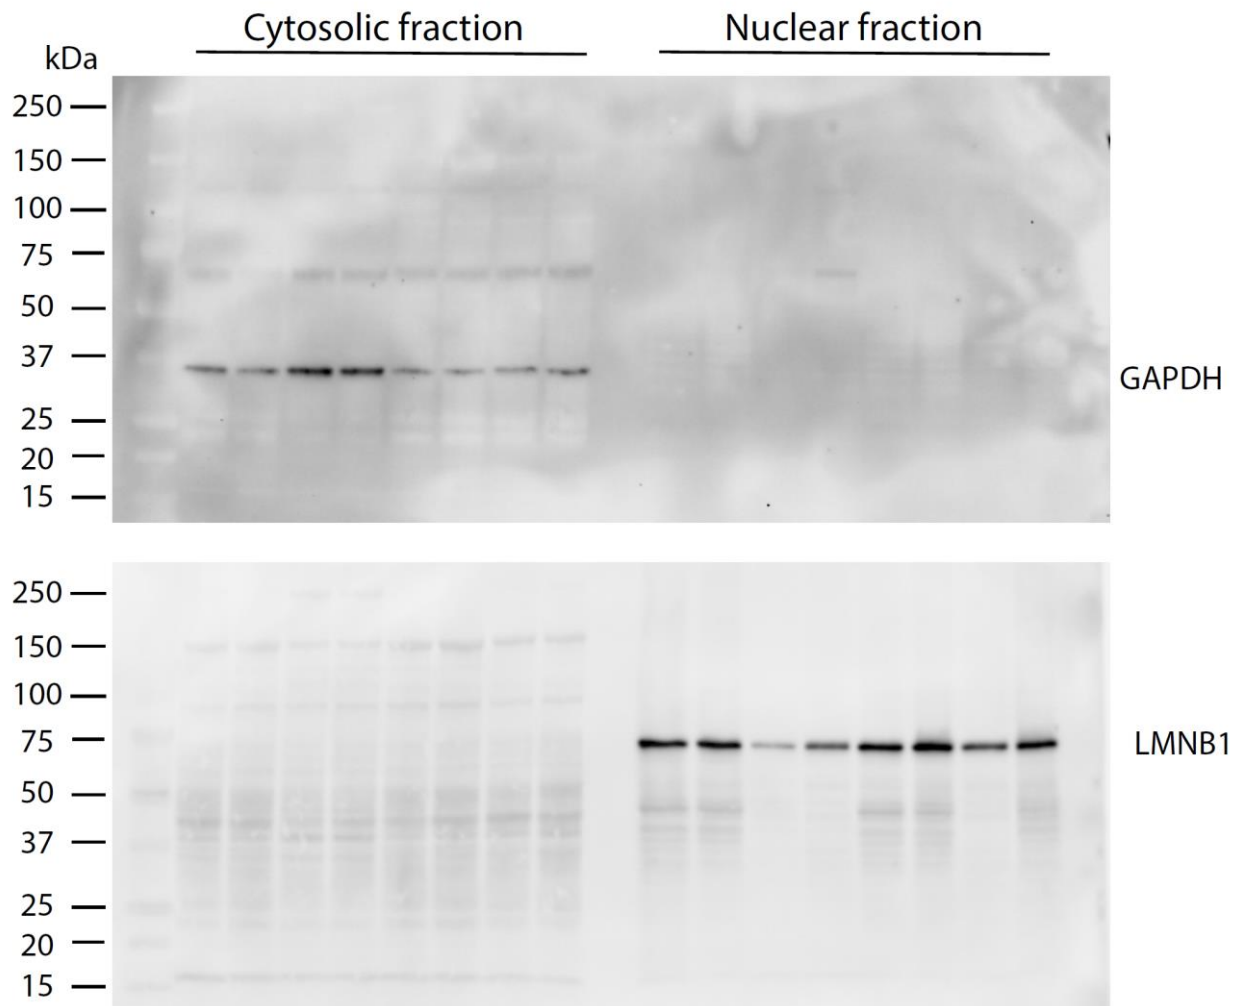

**Supplementary Figure 3. Confirmation of nuclear versus cytosolic fractionation for SREBPF1 blots.** The top panel is blotted for GAPDH and the bottom panel is blotted for LMNB1.

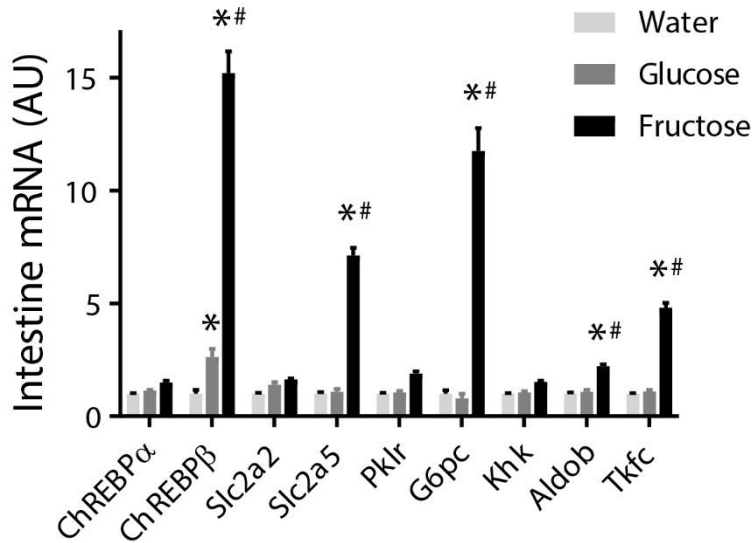

**Supplementary Figure 4. Fructose is more potent than in glucose in activating ChREBP signaling in small intestine.** 8 week old female C3H/HeJ mice were fasted for 5 hours, then gavaged with water, glucose or fructose (4 g/kg of body weight) and sacrificed 100 min later. Intestinal gene expression was measured by qPCR, (n = 6 per group). P values were obtained using 1-way ANOVA, \*P < 0.05 compared with water; # P < 0.05 compared between glucose and fructose treatment.

|              | <b>Forward</b>         | <b>Reverse</b>          |
|--------------|------------------------|-------------------------|
| ChREBP-alpha | AGCATCGATCCGACACTCAC   | TTGTTCCAGCCGGATCTTGTC   |
| ChREBP-beta  | TCTGCAGATCGCGTGGAG     | CTTGTCCCAGCATAGCAAC     |
| Pklr         | CATCCCTGCCTTGATCATCT   | TATCGACTCAGAGCCTGTGG    |
| Fasn         | GCTGCGGAACTTCAGGAAAT   | AGAGACGTGTCACTCCTGGACTT |
| G6pc         | GTGTCCAGGACCCACCAATA   | ACTGTGGGCATCAATCTCCT    |
| Khk          | GGACAGTGCAGGAGTTGGAT   | GGACATCATCAATGTGGTGG    |
| Aldob        | GCTGGGCAATTCAGAGAGC    | GAGGACTCTTCCCCTTTGCT    |
| Slc2a5       | GAGCCCCTCGTAGGTTTTTC   | TCCAGACTTCTGGTTGGAATC   |
| Slc2a2       | TGTCTCTGTGCTGCTTGTG    | ACTCATCCAGGTGAATTATCC   |
| Tkfc         | AGCACACCCTCCACAGAAT    | CGGCATCTCAGAGCAGAAG     |
| Atf6         | CATGTGGTGAATGTGCTGCC   | CACAGCGATATCCGAACCCA    |
| Xbp1s        | GAGTCCGCAGCAGGTG       | GTGTCAGAGTCCATGGGA      |
| Xbp1t        | GAGCAGCAAGTGGTGGATTT   | CCGTGAGTTTTCTCCCGTAA    |
| Bbc3         | TACGAGCGGCGGAGACAAG    | GTGTAGGCACCTAGTTGGGC    |
| Srebf2       | CCCTATTCCATTGACTCTGAGC | GAGTCCGGTTCATCCTTGAC    |
| Hmgcs1       | TTCAAAGGAAGTGACCCAGG   | GGTCTGATCCCCTTTGGTG     |
| Hmgcr        | CACAATAACTTCCCAGGGGT   | GGCCTCCATTTAGATCCG      |
| Sqle         | GATGGGCATTGAGACCTTCT   | TTTAAAAGAGCCCCGACAGGA   |
| Cd68         | GCTTATAGCCCAAGGAACAGAG | CTGTAGGTGTCATCGTGAAGGA  |
| Tnfa         | GATCGGTCCCCAAAGGGATG   | TGAGGGTCTGGGCCATAGAA    |

**Supplementary Table 1. qPCR primers**
